# Supplementary figures and images for: IR laserinduced thermolysis and UV laserinduced photolysis of 1,3diethyldisiloxane: chemical vapour deposition of nanotextured hydridoalkylsilicones
Source: Royal Society of Chemistry journal article supplement (doi:10.1039/b008437i), 2001-01-01

**Fig. 5**


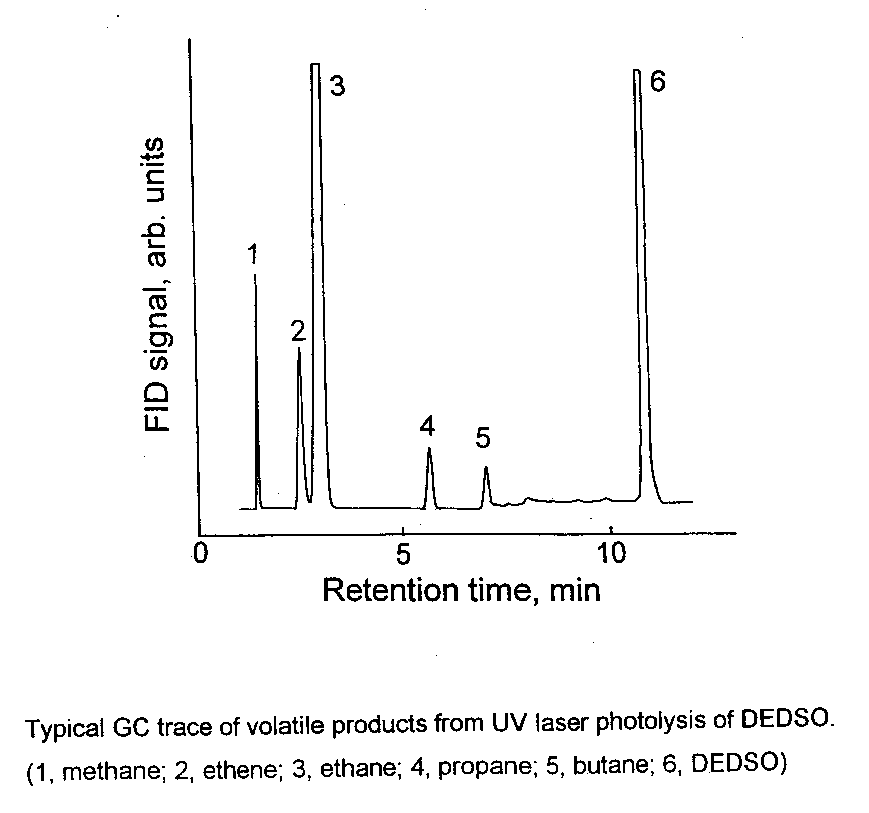

Supplement: b008437i1.doc [file b008437i1.doc]

**Fig. 6**


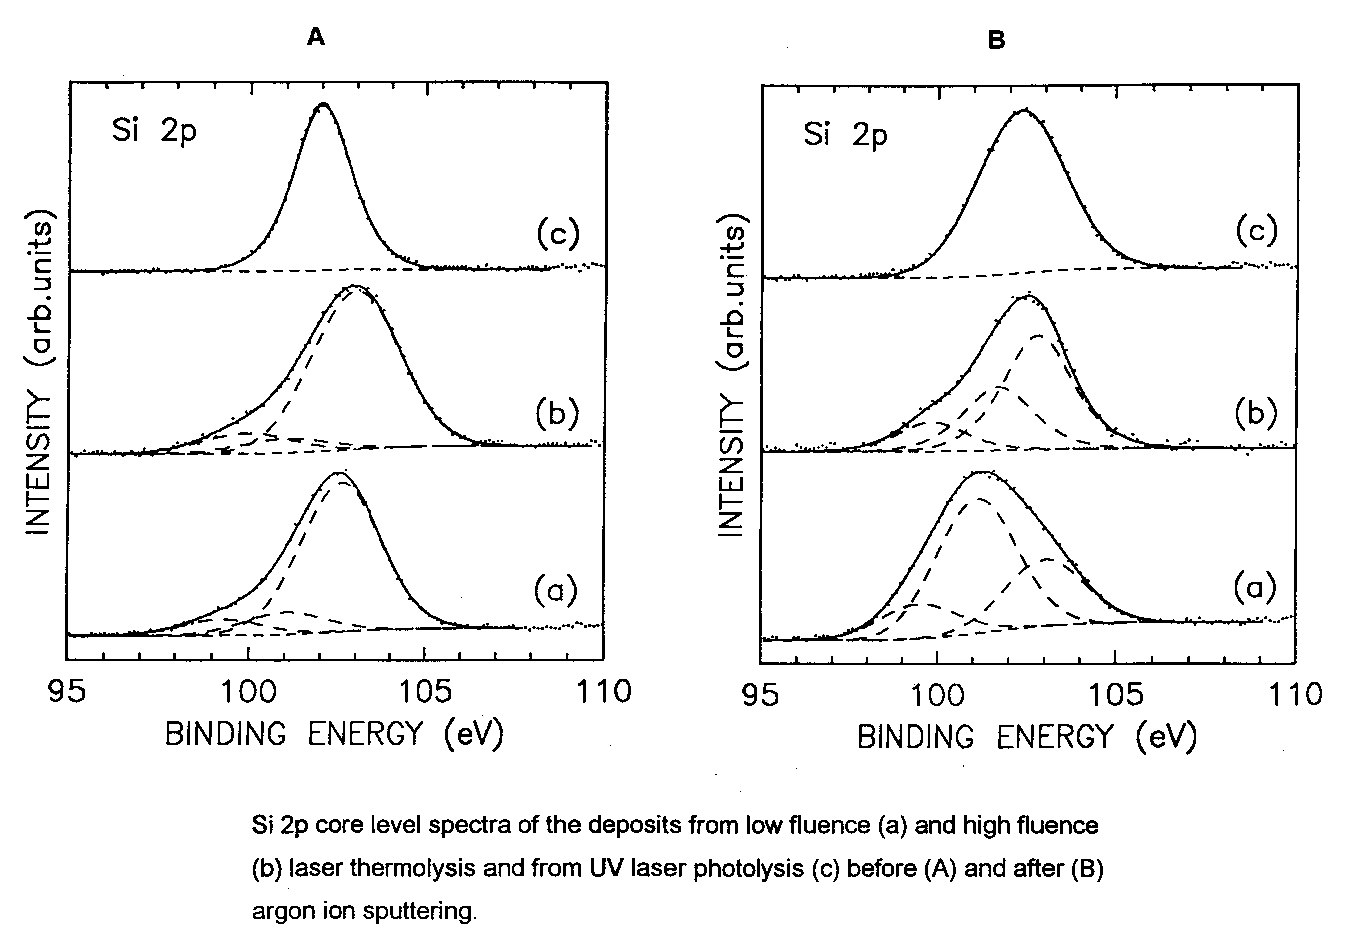

Supplement: b008437i2.doc [file b008437i2.doc]

**Fig. 7**


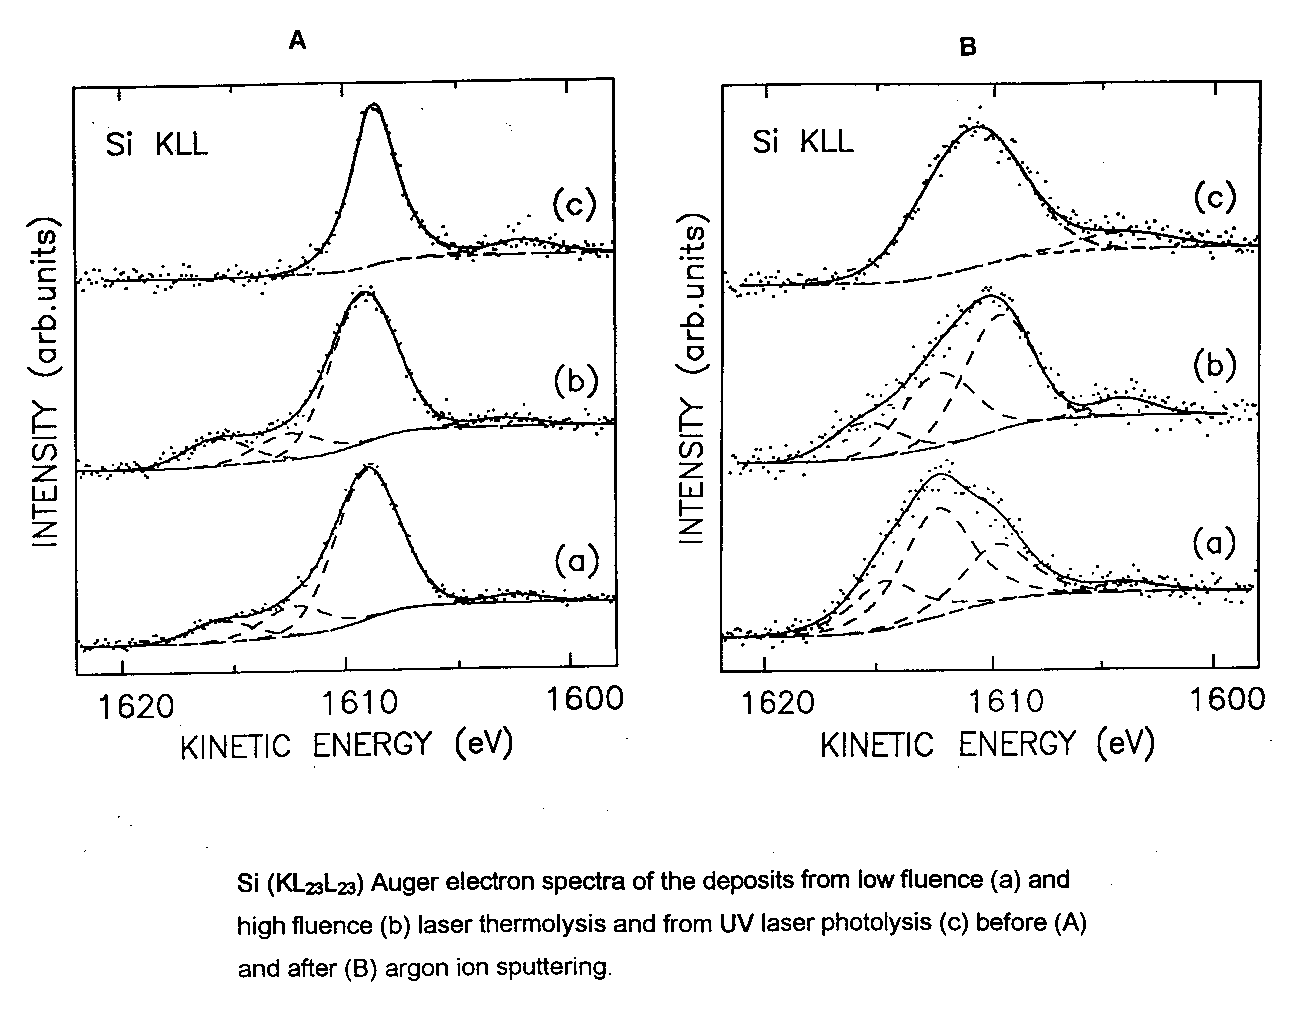

Supplement: b008437i3.doc [file b008437i3.doc]
